# Supplementary material for: Initiating ivabradine during hospitalization in patients with acute heart failure: A real‐world experience in China
Source: PubMed Central journal article supplement (PMC9451666; doi:10.1002/clc.23880), 2022-07-23

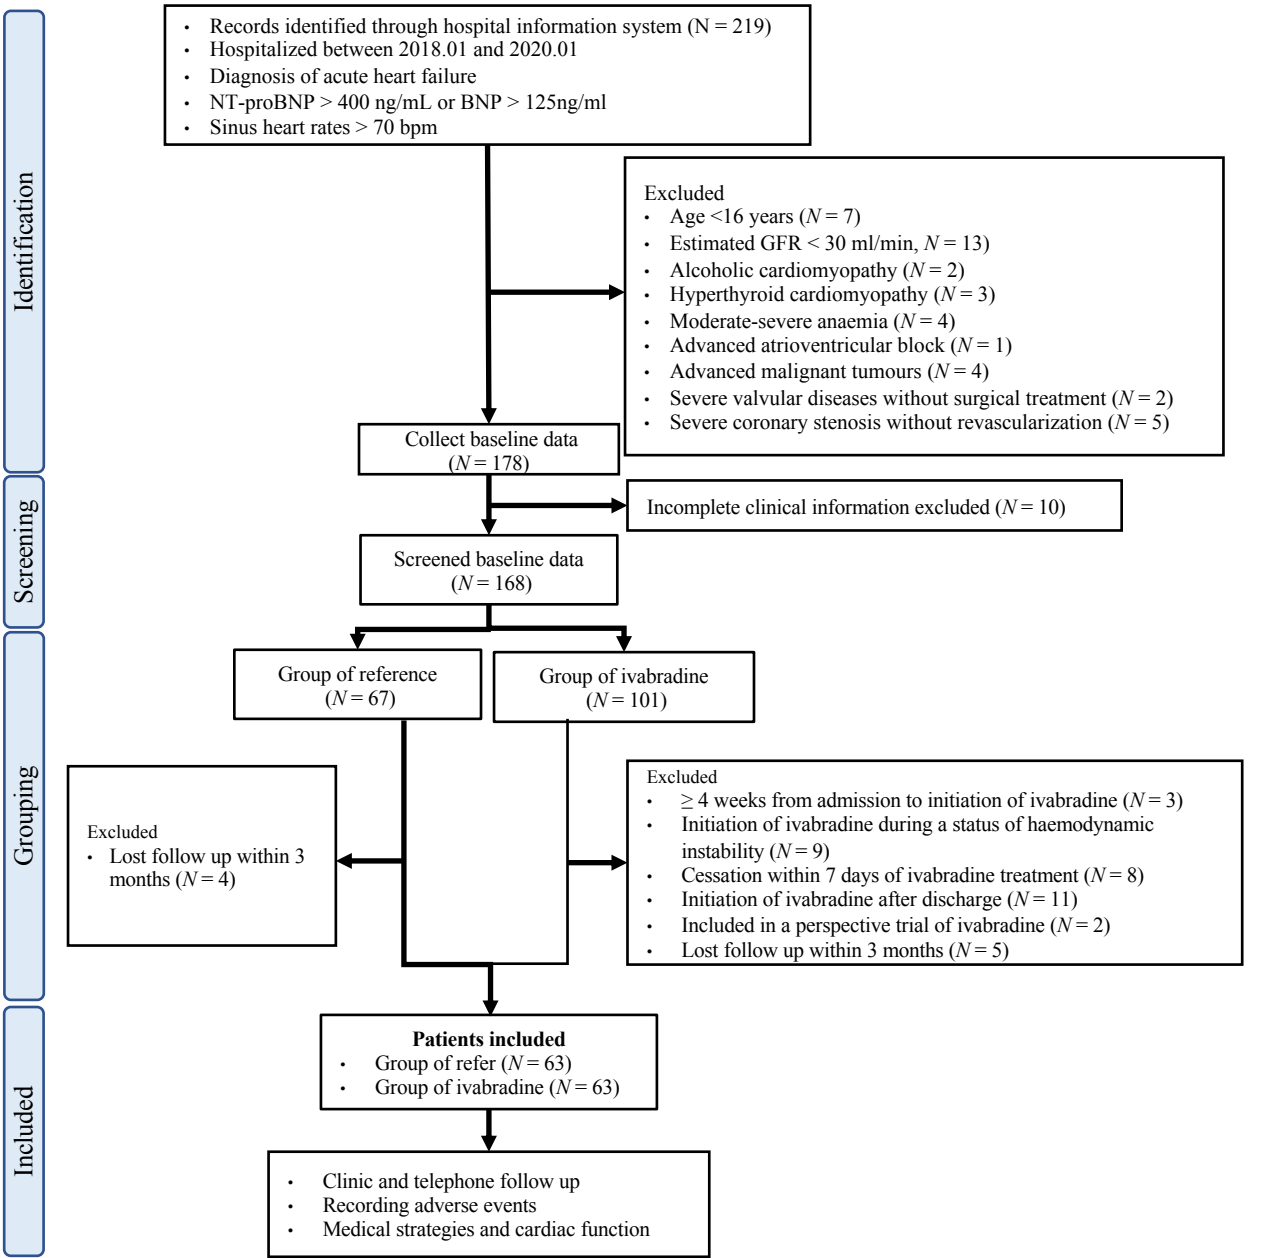

Supplement: CLC-45-928-s004.pdf [file CLC-45-928-s004.pdf]
